# Supplementary material for: Precopulatory behavior and sexual conflict in the desert locust
Source: PeerJ. 2018 Feb 28;6:e4356. doi: 10.7717/peerj.4356 (PMC5834936; doi:10.7717/peerj.4356)
Supplement: Supplemental Information 2 — Transition probabilities (TP) between the different behavioral elements constituting the sub-stages (S1-8), presented in Figs. 1 and 3. [file peerj-06-4356-s002.xlsx]

## Sheet: Transitional Matrices-Pre mount
1																			2																			3
Pre-mounting Stage																			Pre-mounting Stage																			Pre-mounting Stage		Followed by
Preceding element/ Following element	0	1	2	3	4	5	6	7	8	9	10	11	12	13	14	15	Sum of counts		Preceding element/ Following element	0	1	2	3	4	5	6	7	8	9	10	11	12	13	14	15	Sum of counts		Preceding element/ Following element	0	1	2	3	4	5	6	7	8	9	10
	Encounter	Searching	Self-Grooming	Low HL Vibration	High HL Vibration	Short stridulation	Long stridulation	Wings Fluttering	Orienting	Approaching	Initiating physical contact	Mutual antennal contact	HL elevation	Mounting-attempt-J	Mounting-attempt-C	Mounting	Each element			Encounter	Searching	Self-Grooming	Low HL Vibration	High HL Vibration	Short stridulation	Long stridulation	Wings Fluttering	Orienting	Approaching	Initiating physical contact	Mutual antennal contact	HL elevation	Mounting-attempt-J	Mounting-attempt-C	Mounting	Each element			Encounter	Searching	Self-Grooming	Low HL Vibration	High HL Vibration	Short stridulation	Long stridulation	Wings Fluttering	Orienting	Approaching	Initiating physical contact
Encounter	X	1	0	0	0	0	0	0	0	0	0	0	0	0	0	0	1		Encounter	X	1	0	0	0	0	0	0	1	1	0	0	0	0	0	0	3		Encounter	X	8	3	2	0	0	0	0	4	1	0
Probobility (%)	0	1	0	0	0	0	0	0	0	0	0	0	0	0	0	0	1		Probobility (%)	0	0.333333	0	0	0	0	0	0	0.333333	0.333333	0	0	0	0	0	0	1		Probobility (%)	0	0.444444	0.166667	0.111111	0	0	0	0	0.222222	0.0555556	0
Searching	X	X	1	0	0	0	0	0	1	0	0	0	0	0	0	0	2		Searching	X	X	1	0	0	0	0	0	1	1	0	0	2	0	0	0	5		Searching	X	X	0	5	0	0	0	0	8	0	0
Probobility (%)	0	0	0.5	0	0	0	0	0	0.5	0	0	0	0	0	0	0	1		Probobility (%)	0	0	0.2	0	0	0	0	0	0.2	0.2	0	0	0.4	0	0	0	1		Probobility (%)	0	0	0	0.3125	0	0	0	0	0.5	0	0
Self-Grooming	X	0	X	0	0	0	0	0	0	0	0	0	0	0	0	0	0		Self-Grooming	X	0	X	0	0	0	0	0	1	0	0	1	0	0	0	0	2		Self-Grooming	X	2	X	0	0	0	0	0	1	0	0
Probobility (%)	0	0	0	0	0	0	0	0	0	0	0	0	0	0	0	0	0		Probobility (%)	0	0	0	0	0	0	0	0	0.5	0	0	0.5	0	0	0	0	1		Probobility (%)	0	0.666667	0	0	0	0	0	0	0.333333	0	0
Low HL Vibration	X	0	0	X	0	0	0	0	0	0	0	0	0	0	0	0	0		Low HL Vibration	X	0	0	X	0	0	0	0	0	0	0	0	0	0	0	0	0		Low HL Vibration	X	1	0	X	0	0	0	0	0	0	0
Probobility (%)	0	0	0	0	0	0	0	0	0	0	0	0	0	0	0	0	0		Probobility (%)	0	0	0	0	0	0	0	0	0	0	0	0	0	0	0	0	0		Probobility (%)	0	0.5	0	0	0	0	0	0	0	0	0
High HL Vibration	X	0	0	0	X	0	0	0	0	0	0	0	0	0	0	0	0		High HL Vibration	X	0	0	0	X	0	0	0	0	0	0	0	0	0	0	0	0		High HL Vibration	X	0	0	0	X	0	0	0	0	0	0
Probobility (%)	0	0	0	0	0	0	0	0	0	0	0	0	0	0	0	0	0		Probobility (%)	0	0	0	0	0	0	0	0	0	0	0	0	0	0	0	0	0		Probobility (%)	0	0	0	0	0	0	0	0	0	0	0
Short stridulation	X	0	0	0	0	X	0	0	0	0	0	0	0	0	0	0	0		Short stridulation	X	0	0	0	0	X	0	0	0	0	0	0	0	0	0	0	0		Short stridulation	X	0	0	0	0	X	0	0	0	0	0
Probobility (%)	0	0	0	0	0	0	0	0	0	0	0	0	0	0	0	0	0		Probobility (%)	0	0	0	0	0	0	0	0	0	0	0	0	0	0	0	0	0		Probobility (%)	0	0	0	0	0	0	0	0	0	0	0
Long stridulation	X	0	0	0	0	0	X	0	0	0	0	0	0	0	0	0	0		Long stridulation	X	0	0	0	0	0	X	0	0	0	0	0	0	0	0	0	0		Long stridulation	X	0	0	0	0	0	X	0	0	0	0
Probobility (%)	0	0	0	0	0	0	0	0	0	0	0	0	0	0	0	0	0		Probobility (%)	0	0	0	0	0	0	0	0	0	0	0	0	0	0	0	0	0		Probobility (%)	0	0	0	0	0	0	0	0	0	0	0
Wings Fluttering	X	0	0	0	0	0	0	X	0	0	0	0	0	0	0	0	0		Wings Fluttering	X	0	0	0	0	0	0	X	0	0	0	0	0	0	0	0	0		Wings Fluttering	X	0	0	0	0	0	0	X	0	0	0
Probobility (%)	0	0	0	0	0	0	0	0	0	0	0	0	0	0	0	0	0		Probobility (%)	0	0	0	0	0	0	0	0	0	0	0	0	0	0	0	0	0		Probobility (%)	0	0	0	0	0	0	0	0	0	0	0
Orienting	X	0	0	0	0	0	0	0	X	1	0	0	0	0	0	0	1		Orienting	X	1	1	0	0	0	0	0	X	5	0	0	0	1	0	0	8		Orienting	X	2	1	0	0	0	0	0	X	10	0
Probobility (%)	0	0	0	0	0	0	0	0	0	1	0	0	0	0	0	0	1		Probobility (%)	0	0.125	0.125	0	0	0	0	0	0	0.625	0	0	0	0.125	0	0	1		Probobility (%)	0	0.111111	0.0555556	0	0	0	0	0	0	0.555556	0
Approaching	X	1	0	0	0	0	0	0	0	X	1	1	1	0	0	0	4		Approaching	X	0	0	1	0	0	0	0	0	X	7	1	0	0	0	0	9		Approaching	X	1	0	0	0	0	0	0	0	X	2
Probobility (%)	0	0.25	0	0	0	0	0	0	0	0	0.25	0.25	0.25	0	0	0	1		Probobility (%)	0	0	0	0.111111	0	0	0	0	0	0	0.777778	0.111111	0	0	0	0	1		Probobility (%)	0	0.125	0	0	0	0	0	0	0	0	0.25
Initiating physical contact	X	0	0	0	0	0	0	0	0	0	X	0	1	0	0	0	1		Initiating physical contact	X	0	0	0	0	0	0	0	1	0	X	0	2	0	0	0	3		Initiating physical contact	X	0	0	0	0	0	0	0	0	0	X
Probobility (%)	0	0	0	0	0	0	0	0	0	0	0	0	1	0	0	0	1		Probobility (%)	0	0	0	0	0	0	0	0	0.333333	0	0	0	0.666667	0	0	0	1		Probobility (%)	0	0	0	0	0	0	0	0	0	0	0
Mutual antennal contact	X	0	0	0	0	0	0	0	0	0	0	X	0	0	0	0	0		Mutual antennal contact	X	1	0	0	0	0	0	0	0	0	0	X	0	0	0	0	1		Mutual antennal contact	X	0	0	0	0	0	0	0	0	0	0
Probobility (%)	0	0	0	0	0	0	0	0	0	0	0	0	0	0	0	0	0		Probobility (%)	0	1	0	0	0	0	0	0	0	0	0	0	0	0	0	0	1		Probobility (%)	0	0	0	0	0	0	0	0	0	0	0
HL elevation	X	0	0	0	0	0	0	0	0	2	0	0	X	0	0	0	2		HL elevation	X	0	0	0	0	0	0	0	1	1	0	0	X	0	0	0	2		HL elevation	X	0	0	0	0	0	0	0	0	0	0
Probobility (%)	0	0	0	0	0	0	0	0	0	1	0	0	0	0	0	0	1		Probobility (%)	0	0	0	0	0	0	0	0	0.5	0.5	0	0	0	0	0	0	1		Probobility (%)	0	0	0	0	0	0	0	0	0	0	0
Mounting-attempt-J	X	0	0	0	0	0	0	0	0	0	0	0	0	X	0	0	0		Mounting-attempt-J	X	0	0	0	0	0	0	0	0	0	0	0	0	X	0	2	2		Mounting-attempt-J	X	0	0	0	0	0	0	0	0	0	0
Probobility (%)	0	0	0	0	0	0	0	0	0	0	0	0	0	0	0	0	0		Probobility (%)	0	0	0	0	0	0	0	0	0	0	0	0	0	0	0	1	1		Probobility (%)	0	0	0	0	0	0	0	0	0	0	0
Mounting-attempt-C	X	0	0	0	0	0	0	0	0	0	0	0	0	0	X	1	1		Mounting-attempt-C	X	0	0	0	0	0	0	0	1	1	0	0	0	0	X	0	2		Mounting-attempt-C	X	0	0	0	0	0	0	0	0	0	0
Probobility (%)	0	0	0	0	0	0	0	0	0	0	0	0	0	0	0	1	1		Probobility (%)	0	0	0	0	0	0	0	0	0.5	0.5	0	0	0	0	0	0	1		Probobility (%)	0	0	0	0	0	0	0	0	0	0	0
Male's Dislodged	X	0	0	0	0	0	0	0	0	0	0	0	0	0	0	X	0		Dislodged	X	1	0	0	0	0	0	0	1	0	0	0	0	0	0	X	2		Dislodged	X	1	0	0	0	0	0	0	0	0	0
Probobility (%)	0	0	0	0	0	0	0	0	0	0	0	0	0	0	0	0	0		Probobility (%)	0	0.5	0	0	0	0	0	0	0.5	0	0	0	0	0	0	0	1		Probobility (%)	0	1	0	0	0	0	0	0	0	0	0
Sum of Probobilities Among Gregarious Males
Preceding element/ Following element	0	1	2	3	4	5	6	7	8	9	10	11	12	13	14	15	Sum of counts
	Encounter	Searching	Grooming	Low HL Vibration-L	High HL Vibration	Short stridulation	Long stridulation	W-flapping	Orienting	Approaching	Touching the female	Mutual antennal contact	HL elevation	Mounting-attempt-J	Mounting-attempt-C	Mounting	Each element
Encounter	X	0	0	0	0	0	0	0	0	0	0	0	0	0	0	0	0
Probobility (%)	0	7.92222	2.01667	0.111111	0	0.25	0	0	4.26667	2.46111	0	0.222222	0.861111	0	0	0	18.1111
Searching	X	X	0	0	0	0	0	0	0	0	0	0	0	0	0	0	0
Probobility (%)	0	0	4.66179	1.05508	0.433333	0.415152	0	0.280368	6.58154	2.77289	0	0.215909	3.31727	0.266667	0	0	20
Grooming	X	0	0	0	0	0	0	0	0	0	0	0	0	0	0	0	0
Probobility (%)	0	9.72532	0	0.305195	0.181818	0.233766	0	0.590909	2.25758	0.939394	0	0.785714	2.07121	0	0	0	17.0909
Low HL Vibration-L	X	0	0	X	0	0	0	0	0	0	0	0	0	0	0	0	0
Probobility (%)	0	3.23333	0.866667	0	0.333333	0.333333	0.333333	0	0.333333	1	0	0	1.23333	0.333333	0	0	8
High HL Vibration	X	0	0	0	X	0	0	0	0	0	0	0	0	0	0	0	0
Probobility (%)	0	1.66667	0	0	0	0	0	1	0	0	0	0	1.33333	0	0	0	4
Short stridulation	X	0	0	0	0	X	0	0	0	0	0	0	0	0	0	0	0
Probobility (%)	0	1	0.5	0.666667	0	0	0.111111	0.111111	1.94444	1.33333	0	0	0.777778	0.444444	0.111111	0	7
Long stridulation	X	0	0	0	0	0	X	0	0	0	0	0	0	0	0	0	0
Probobility (%)	0	1	0	0	0	0	0	0	0.5	0	0	0	0	0.5	0	0	2
Wings fluttering	X	0	0	0	0	0	0	X	0	0	0	0	0	0	0	0	0
Probobility (%)	0	2.03333	0.4	1	0	0	0	0	0.333333	0.666667	0	0.2	1.36667	0	0	0	6
Orienting	X	0	0	0	0	0	0	0	X	0	0	0	0	0	0	0	0
Probobility (%)	0	1.84123	0.281788	0	0	0	0	0	0	12.5235	0.0192308	0.0714286	2.95219	1.07626	0.234382	0	19
Approaching	X	0	0	0	0	0	0	0	0	X	0	0	0	0	0	0	0
Probobility (%)	0	1.87411	0.529762	0.444444	0	0	0	0	1.18139	0	8.596	1.47063	2.72194	3.09081	0.0909091	0	20
Initiating physical contact	X	0	0	0	0	0	0	0	0	0	X	0	0	0	0	0	0
Probobility (%)	0	2.28889	0.611111	0	0	0.25	0	0	1.08889	0	0	2.24167	4.58889	2.76944	1.16111	0	15
Mutual antennal contact	X	0	0	0	0	0	0	0	0	0	0	X	0	0	0	0	0
Probobility (%)	0	5.83333	0.166667	1	0	0.333333	0.166667	0	2.33333	0	0	0	1.16667	0	0	0	11
HL elevation	X	0	0	0	0	0	0	0	0	0	0	0	X	0	0	0	0
Probobility (%)	0	5.29167	2.25278	1.66667	0	1.91667	0	1.19444	3.05278	2.29167	0.125	0.125	0	0.25	0.166667	0	18.3333
Mounting-attempt-J	X	0	0	0	0	0	0	0	0	0	0	0	0	X	0	0	0
Probobility (%)	0	0.119048	0.0833333	0	0	0	0	0	0.916667	1.10714	0	0	0.047619	0	0	15.7262	18
Mounting-attempt-C	X	0	0	0	0	0	0	0	0	0	0	0	0	0	X	0	0
Probobility (%)	0	1	0	0	0	0	0	0	0.5	0.5	0	0	0	0	0	4	6
Dislodged	X	0	0	0	0	0	0	0	0	0	0	0	0	0	0	X	0
Probobility (%)	0	4.5	0	0	0	2.70833	0.5	0.5	1.83333	0	0	0	0.166667	0.708333	0.0833333	0	11
[truncated: 325 more columns]

## Sheet: TP-Pre-mounting
Weighted Average of Transitional Probobilities Among Gregarious Males (N=20)
Preceding element/ Following element	0	1	2	3	4	5	6	7	8	9	10	11	12	13	14	15
	Encounter	Searching	Self-Grooming	Low HL Vibration	High HL Vibration	Short stridulation	Long stridulation	Wings fluttering	Orienting	Approaching	Initiating physical contact	Mutual antennal contact	HL elevation	Mounting-attempt-J	Mounting-attempt-C	Mounting
Encounter	X	x	x	x	x	x	x	x	x	x	x	x	x	x	x	x
Probobility (%)	0	0.396111	0.100833	0.00555556	0	0.0125	0	0	0.213333	0.123056	0	0.0111111	0.0430556	0	0	0
Searching	X	X	x	x	x	x	x	x	x	x	x	x	x	x	x	x
Probobility (%)	0	0	0.23309	0.0527539	0.0216667	0.0207576	0	0.0140184	0.329077	0.138645	0	0.0107955	0.165863	0.0133333	0	0
Self-Grooming	X	x	x	x	x	x	x	x	x	x	x	x	x	x	x	x
Probobility (%)	0	0.486266	0	0.0152597	0.00909091	0.0116883	0	0.0295455	0.112879	0.0469697	0	0.0392857	0.103561	0	0	0
Low HL Vibration	X	x	x	x	x	x	x	x	x	x	x	x	x	x	x	x
Probobility (%)	0	0.161667	0.0433333	0	0.0166667	0.0166667	0.0166667	0	0.0166667	0.05	0	0	0.0616667	0.0166667	0	0
High HL Vibration	X	x	x	x	x	x	x	x	x	x	x	x	x	x	x	x
Probobility (%)	0	0.0833333	0	0	0	0	0	0.05	0	0	0	0	0.0666667	0	0	0
Short stridulation	X	x	x	x	x	x	x	x	x	x	x	x	x	x	x	x
Probobility (%)	0	0.05	0.025	0.0333333	0	0	0.00555556	0.00555556	0.0972222	0.0666667	0	0	0.0388889	0.0222222	0.00555556	0
Long stridulation	X	x	x	x	x	x	x	x	x	x	x	x	x	x	x	x
Probobility (%)	0	0.05	0	0	0	0	0	0	0.025	0	0	0	0	0.025	0	0
Wings fluttering	X	x	x	x	x	x	x	x	x	x	x	x	x	x	x	x
Probobility (%)	0	0.101667	0.02	0.05	0	0	0	0	0.0166667	0.0333333	0	0.01	0.0683333	0	0	0
Orienting	X	x	x	x	x	x	x	x	x	x	x	x	x	x	x	x
Probobility (%)	0	0.0920615	0.0140894	0	0	0	0	0	0	0.626175	0.000961538	0.00357143	0.14761	0.0538129	0.0117191	0
Approaching	X	x	x	x	x	x	x	x	x	x	x	x	x	x	x	x
Probobility (%)	0	0.0937053	0.0264881	0.0222222	0	0	0	0Weighted Average of Transitional Probobilities Among Gregarious Males (N=20)	0.0590693	0	0.4298	0.0735317	0.136097	0.154541	0.00454545	0
Initiating physical contact	X	x	x	x	x	x	x	x	x	x	x	x	x	x	x	x
Probobility (%)	0	0.114444	0.0305556	0	0	0.0125	0	0	0.0544444	0	0	0.112083	0.229444	0.138472	0.0580556	0
Mutual antennal contact	X	x	x	x	x	x	x	x	x	x	x	x	x	x	x	x
Probobility (%)	0	0.291667	0.00833333	0.05	0	0.0166667	0.00833333	0	0.116667	0	0	0	0.0583333	0	0	0
HL elevation	X	x	x	x	x	x	x	x	x	x	x	x	x	x	x	x
Probobility (%)	0	0.264583	0.112639	0.0833333	0	0.0958333	0	0.0597222	0.152639	0.114583	0.00625	0.00625	0	0.0125	0.00833333	0
Mounting-attempt-J	X	x	x	x	x	x	x	x	x	x	x	x	x	x	x	x
Probobility (%)	0	0.00595238	0	0	0	0	0	0	0.0458333	0	0	0	0	0	0	0.84375
Mounting-attempt-C	X	x	x	x	x	x	x	x	x	x	x	x	x	x	x	x
Probobility (%)	0	0.05	0	0	0	0	0	0	0.025	0.025	0	0	0	0	0	0.2
Dislodged	X	x	x	x	x	x	x	x	x	x	x	x	x	x	x	x
Probobility (%)	0	0.225	0	0	0	0.135417	0.025	0.025	0.0916667	0	0	0	0.00833333	0.0354167	0.00416667	0

## Sheet: Transitional Matrices-Mounting
1														2														3														4
Mounting Stage														Mounting Stage														Mounting Stage														Mounting Stage
Preceding element/ Following element	15	16	17	18	19	20	21	22	23	24	25	Sum of counts		Preceding element/ Following element	15	16	17	18	19	20	21	22	23	24	25	Sum of counts		Preceding element/ Following element	15	16	17	18	19	20	21	22	23	24	25	Sum of counts		Preceding element/ Following element	15	16	17	18	19	20	21
	Mounting (the female)	Male's Dislodged	Avoidance (defence)	Blocking (defence)	Lifting attempt	HL Vibration	Short stridulation	Long stridulation	HL Grounding	Copulation attempt	Copulation	Each element			Mounting (the female)	Male's Dislodged	Avoidance (defence)	Blocking (defence)	Lifting attempt	HL Vibration	Short stridulation	Long stridulation	HL Grounding	Copulation attempt	Copulation	Each element			Mounting (the female)	Male's Dislodged	Avoidance (defence)	Blocking (defence)	Lifting attempt	HL Vibration	Short stridulation	Long stridulation	HL Grounding	Copulation attempt	Copulation	Each element			Mounting (the female)	Male's Dislodged	Avoidance (defence)	Blocking (defence)	Lifting attempt	HL Vibration	Short stridulation
Mounting (the female)	X	0	0	0	0	1	1	0	1	0	0	3		Mounting (the female)	X	2	0	0	0	2	0	1	0	1	0	6		Mounting (the female)	X	1	0	0	0	1	1	0	1	0	0	4		Mounting (the female)	X	0	0	0	0	0	0
Probobility (%)	0	0	0	0	0	0.333333	0.333333	0	0.333333	0	0	1		Probobility (%)	0	0.333333	0	0	0	0.333333	0	0.166667	0	0.166667	0	1		Probobility (%)	0	0.25	0	0	0	0.25	0.25	0	0.25	0	0	1		Probobility (%)	0	0	0	0	0	0	0
Male's Dislodged	X	X	X	X	X	X	X	X	X	X	X	0		Male's Dislodged	X	X	X	X	X	X	X	X	X	X	X	0		Male's Dislodged	X	X	X	X	X	X	X	X	X	X	X	0		Male's Dislodged	X	X	X	X	X	X	X
Probobility (%)	0	0	0	0	0	0	0	0	0	0	0	0		Probobility (%)	0	0	0	0	0	0	0	0	0	0	0	0		Probobility (%)	0	0	0	0	0	0	0	0	0	0	0	0		Probobility (%)	0	0	0	0	0	0	0
Avoidance (defence)	0	0	X	0	0	0	0	0	0	0	0	0		Avoidance (defence)	0	0	X	0	0	0	0	0	0	0	0	0		Avoidance (defence)	0	0	X	0	0	0	0	0	0	0	0	0		Avoidance (defence)	0	0	X	0	0	0	0
Probobility (%)	0	0	0	0	0	0	0	0	0	0	0	0		Probobility (%)	0	0	0	0	0	0	0	0	0	0	0	0		Probobility (%)	0	0	0	0	0	0	0	0	0	0	0	0		Probobility (%)	0	0	0	0	0	0	0
Blocking (defence)	0	0	0	X	0	0	0	0	0	0	0	0		Blocking (defence)	0	0	0	X	0	0	0	0	0	0	0	0		Blocking (defence)	0	0	0	X	0	0	0	0	0	0	0	0		Blocking (defence)	0	0	0	X	0	0	0
Probobility (%)	0	0	0	0	0	0	0	0	0	0	0	0		Probobility (%)	0	0	0	0	0	0	0	0	0	0	0	0		Probobility (%)	0	0	0	0	0	0	0	0	0	0	0	0		Probobility (%)	0	0	0	0	0	0	0
Lifting attempt	0	0	0	0	x	0	0	0	0	2	0	2		Lifting attempt	0	0	0	0	X	0	0	0	0	0	0	0		Lifting attempt	0	0	0	0	X	0	0	0	0	1	0	1		Lifting attempt	0	0	0	0	X	0	0
Probobility (%)	0	0	0	0	0	0	0	0	0	1	0	1		Probobility (%)	0	0	0	0	0	0	0	0	0	0	0	0		Probobility (%)	0	0	0	0	0	0	0	0	0	1	0	1		Probobility (%)	0	0	0	0	0	0	0
HL Vibration	0	0	0	0	0	X	0	0	1	0	0	1		HL Vibration	0	0	0	0	0	X	0	0	1	0	0	1		HL Vibration	0	0	0	0	0	0	0	0	3	0	0	3		HL Vibration	0	0	0	0	0	X	0
Probobility (%)	0	0	0	0	0	0	0	0	1	0	0	1		Probobility (%)	0	0	0	0	0	0	0	0	1	0	0	1		Probobility (%)	0	0	0	0	0	0	0	0	1	0	0	1		Probobility (%)	0	0	0	0	0	0	0
Short stridulation	0	0	0	0	0	0	X	0	0	0	0	0		Short stridulation	0	0	0	0	0	0	X	1	0	0	0	1		Short stridulation	0	0	0	0	0	0	0	0	0	0	0	0		Short stridulation	0	0	0	0	0	0	X
Probobility (%)	0	0	0	0	0	0	0	0	0	0	0	0		Probobility (%)	0	0	0	0	0	0	0	1	0	0	0	1		Probobility (%)	0	0	0	0	0	0	0	0	0	0	0	0		Probobility (%)	0	0	0	0	0	0	0
Long stridulation	0	0	0	0	0	0	0	X	0	0	0	0		Long stridulation	0	0	0	0	0	0	2	X	0	0	0	2		Long stridulation	0	0	0	0	0	0	0	0	0	0	0	0		Long stridulation	0	0	0	0	0	0	1
Probobility (%)	0	0	0	0	0	0	0	0	0	0	0	0		Probobility (%)	0	0	0	0	0	0	1	0	0	0	0	1		Probobility (%)	0	0	0	0	0	0	0	0	0	0	0	0		Probobility (%)	0	0	0	0	0	0	1
HL Grounding	0	0	0	0	2	0	1	0	X	0	0	3		HL Grounding	0	0	0	0	0	0	1	1	X	1	0	3		HL Grounding	0	0	0	0	1	2	0	0	0	0	0	3		HL Grounding	0	0	0	0	0	0	0
Probobility (%)	0	0	0	0	0.666667	0	0.333333	0	0	0	0	1		Probobility (%)	0	0	0	0	0	0	0.333333	0.333333	0	0.333333	0	1		Probobility (%)	0	0	0	0	0.333333	0.666667	0	0	0	0	0	1		Probobility (%)	0	0	0	0	0	0	0
Copulation attempt	0	0	0	0	1	0	0	0	0	X	1	2		Copulation attempt	0	0	0	0	0	0	0	0	0	X	1	1		Copulation attempt	0	0	0	0	0	0	0	0	0	0	1	1		Copulation attempt	0	0	0	0	0	0	0
Probobility (%)	0	0	0	0	0.5	0	0	0	0	0	0.5	1		Probobility (%)	0	0	0	0	0	0	0	0	0	0	1	1		Probobility (%)	0	0	0	0	0	0	0	0	0	0	1	1		Probobility (%)	0	0	0	0	0	0	0
Copolation	X	X	X	X	X	X	X	X	X	X	X	0		Copolation	X	X	X	X	X	X	X	X	X	X	X	0		Copolation	0	0	0	0	0	0	0	0	0	0	0	0		Copolation	X	X	X	X	X	X	X
Probobility (%)	0	0	0	0	0	0	0	0	0	0	0	0		Probobility (%)	0	0	0	0	0	0	0	0	0	0	0	0		Probobility (%)	0	0	0	0	0	0	0	0	0	0	0	0		Probobility (%)	0	0	0	0	0	0	0
Sum of Probobilities Among Gregarious Males (N=20)
Preceding element/ Following element	13	14	15	16	17	18	19	20	21	22	23	Sum of counts
	Mounting (the female)	Male's Dislodged	Avoidance (defence)	Blocking (defence)	Lifting attempt	HL Vibration	Short stridulation	Long stridulation	HL Grounding	Copulation attempt	Copulation	Each element
Mounting (the female)	X	X	X	X	X	X	X	X	X	X	X	0
Probobility (%)	0	3.81667	0.5	0.583333	0.25	3.13056	2.90833	2.26389	1.90833	4.63889	0	20
Male's Dislodged	X	X	X	X	X	X	X	X	X	X	X	0
Probobility (%)	0	0	0	0	0	0	0	0	0	0	0	0
Avoidance (defence)	X	X	X	X	X	X	X	X	X	X	X	0
Probobility (%)	0	0	0	0	0	1.33333	1.25	0.0833333	1.16667	0.166667	0	4
Blocking (defence)	X	X	X	X	X	X	X	X	X	X	X	0
Probobility (%)	0	0	0.5	0	0	0.5	0	1	0.5	0.5	0	3
Lifting attempt	X	X	X	X	x	X	X	X	X	X	X	0
Probobility (%)	0	0	0.181818	0	0	1.08658	0	0	1.09091	9.64069	0	12
HL Vibration	X	X	X	X	X	X	X	X	X	X	X	0
Probobility (%)	0	0.5	0.214286	0.0714286	0.5	0	0	0	15.7143	0	0	17
Short stridulation	X	X	X	X	X	X	X	X	X	X	X	0
Probobility (%)	0	0.166667	1.09091	0	0	0	0	9.74242	0	0	0	11
Long stridulation	X	X	X	X	X	X	X	X	X	X	X	0
Probobility (%)	0	0.25	0.25	0.125	0.2	0	9.175	0	0	0	0	10
HL Grounding	X	X	X	X	X	X	X	X	X	X	X	0
Probobility (%)	0	0	1.94386	0.363636	4.15662	7.00255	0.666667	0.333333	0	1.53333	0	16
Copulation attempt	X	X	X	X	X	X	X	X	X	X	X	0
Probobility (%)	0	0	1.16667	0	1.66667	0.166667	0	0	0	0	17	20
Copolation	X	X	X	X	X	X	X	X	X	X	X	0
Probobility (%)	0	0	0	0	0	0	0	0	0	0	0	0
[truncated: 213 more columns]

## Sheet: TP-Mounting
Weighted Average of Transitional Probobilities Among Gregarious Males (N=20)
Mounting stage
Preceding element/ Following element	13	14	15	16	17	18	19	20	21	22	23
	Mounting (the female)	Male's Dislodged	Avoidance (defence)	Blocking (defence)	Lifting attempt	HL Vibration	Short stridulation	Long stridulation	HL Grounding	Copulation attempt	Copulation
Mounting (the female)	X	X	X	X	X	X	X	X	X	X	X
Probobility (%)	0	0.190833	0.025	0.0291667	0.0125	0.156528	0.145417	0.113194	0.0954167	0.231944	0
Male's Dislodged	X	X	X	X	X	X	X	X	X	X	X
Probobility (%)	0	0	0	0	0	0	0	0	0	0	0
Avoidance (defence)	X	X	X	X	X	X	X	X	X	X	X
Probobility (%)	0	0	0	0	0	0.0666667	0.0625	0.00416667	0.0583333	0.00833333	0
Blocking (defence)	X	X	X	X	X	X	X	X	X	X	X
Probobility (%)	0	0	0.025	0	0	0.025	0	0.05	0.025	0.025	0
Lifting attempt	X	X	X	X	X	X	X	X	X	X	X
Probobility (%)	0	0	0.00909091	0	0	0.054329	0	0	0.0545455	0.482035	0
HL Vibration	X	X	X	X	X	X	X	X	X	X	X
Probobility (%)	0	0.025	0.0107143	0.00357143	0.025	0	0	0	0.785714	0	0
Short stridulation	X	X	X	X	X	X	X	X	X	X	X
Probobility (%)	0	0.00833333	0.0545455	0	0	0	0	0.487121	0	0	0
Long stridulation	X	X	X	X	X	X	X	X	X	X	X
Probobility (%)	0	0.0125	0.0125	0.00625	0.01	0	0.45875	0	0	0	0
HL Grounding	X	X	X	X	X	X	X	X	X	X	X
Probobility (%)	0	0	0.097193	0.0181818	0.207831	0.350128	0.0333333	0.0166667	0	0.0766667	0
Copulation attempt	X	X	X	X	X	X	X	X	X	X	X
Probobility (%)	0	0	0.0583333	0	0.0833333	0.00833333	0	0	0	0	0.85
Copolation	X	X	X	X	X	X	X	X	X	X	X
Probobility (%)	0	0	0	0	0	0	0	0	0	0	0
